# Supplementary material
Source: PubMed Central journal article supplement (PMC7371431)
Supplement: NIHMS1608489-supplement-1.pdf [file NIHMS1608489-supplement-1.pdf]

**Cell Reports, Volume 31**

**Supplemental Information**

**Angiocrine Sphingosine-1-Phosphate Activation  
of S1PR2-YAP Signaling Axis in Alveolar  
Type II Cells Is Essential for Lung Repair**

**Qian Chen, Jalees Rehman, Manwai Chan, Panfeng Fu, Steven M. Dudek, Viswanathan Natarajan, Asrar B. Malik, and Yuru Liu**

**SUPPLEMENTAL FILES:**

Figure S1 related to Figure 1

Figure S2 related to Figure 2

Figure S3 related to Figure 2

Figure S4 related to Figure 3

Figure S5 related to Figure 4

Figure S6 related to Figure 6

Figure S7 related to Figure 7

Table S1 related to Star Method

SUPPLEMENTAL FIGURES

Chen et al Supplemental Figure 1 ↑

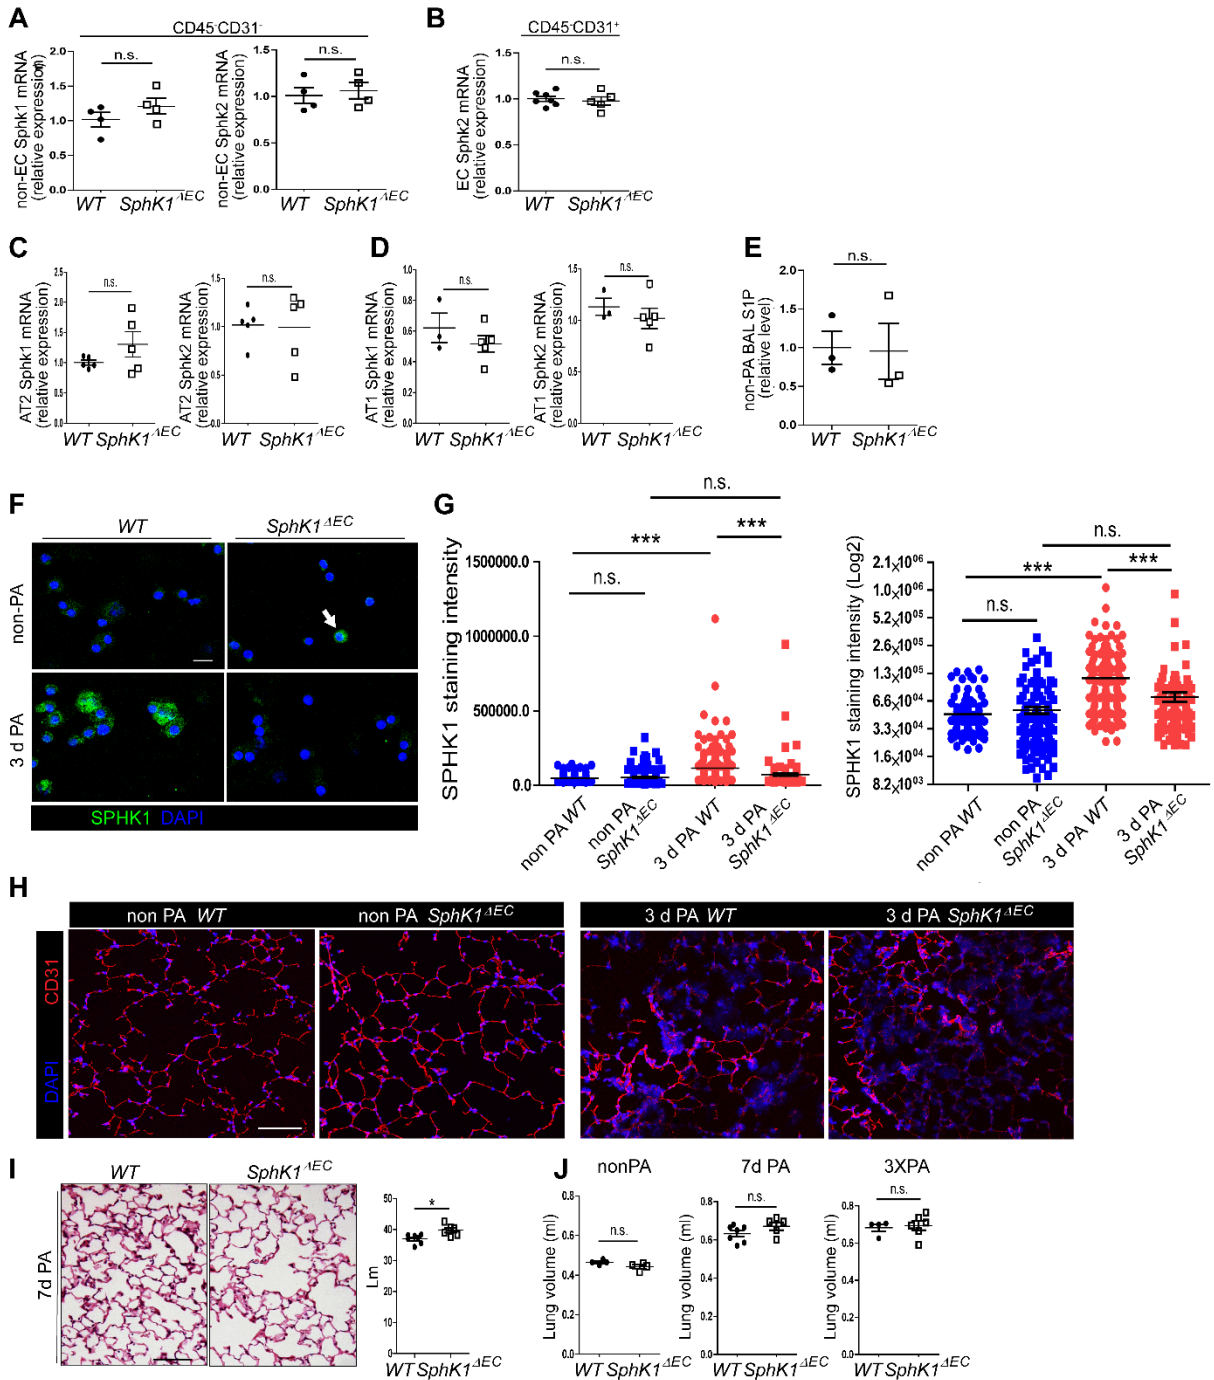

**Figure S1 related to Figure 1. The specificity of endothelial *Sphk1* disruption in *SphK1<sup>ΔEC</sup>* mice.** (A-D) qPCR analysis. (A) Similar expression levels of *Sphk1* and *Sphk2* in non-EC cells (CD45<sup>-</sup>CD31<sup>-</sup>) comparing *WT* and *SphK1<sup>ΔEC</sup>* mice. (B) Similar levels of *Sphk2* in ECs (CD45<sup>-</sup>CD31<sup>+</sup>) between *WT* and *SphK1<sup>ΔEC</sup>* mice. (C and D) The expression levels of *Sphk1* and *Sphk2* in AT2 (C) and AT1 (D) were similar between *WT* and *SphK1<sup>ΔEC</sup>* mice. (E) BAL S1P levels were measured for uninjured *WT* and *SphK1<sup>ΔEC</sup>* mice. (F) EC were isolated from uninjured and 3 d post injured lungs of *WT* and *SphK1<sup>ΔEC</sup>* mice and fixed on slides by cytospin. EC were stained for SPHK1. Scale bar = 10 μm. (G) The SPHK1 staining intensity in individual cells were quantified and both linear and log2 values were shown. >100 cells were quantified per sample, 3 independent experiments were conducted and showed similar results. (H) Sections of uninjured and 3 d post PA lungs of *WT* and *SphK1<sup>ΔEC</sup>* mice were stained for CD31. (I) Lungs were collected from *WT* and *SphK1<sup>ΔEC</sup>* mice at 7 d post a single PA injection, Lm was quantified on H/E stained sections. (J) Total lung volumes were measured from uninjured, 7 d post a single PA and 7 d post 3 repetitive PA injured lungs. Mean ± SEM. \*: p<0.05; \*\*\*: p<0.001; n.s.: not significant.

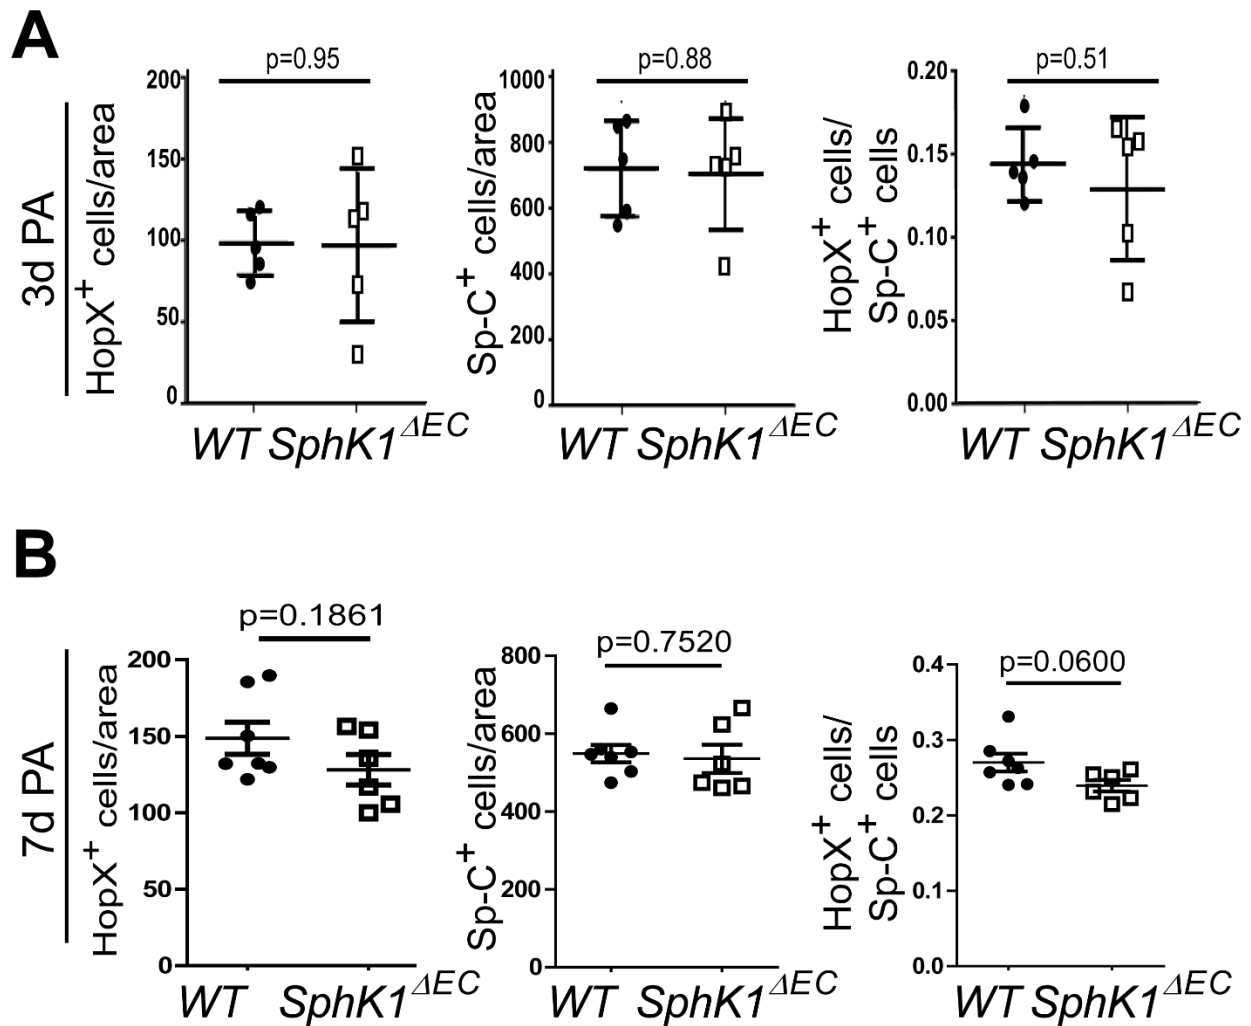

**Figure S2 related to Figure 2. Quantification of AT1 and AT2 in *SphK1*<sup>ΔEC</sup> lungs post injury.** Lung sections of *WT* and *SphK1*<sup>ΔEC</sup> mice at 3 d (A) and 7 d (B) post 1X PA were stained for HopX and Sp-C and the number of HopX<sup>+</sup> and Sp-C<sup>+</sup> cells per area and the ratio of HopX<sup>+</sup>/Sp-C<sup>+</sup> cells were quantified. Mean ± SEM.

Chen et al Supplemental Figure 3 ↑

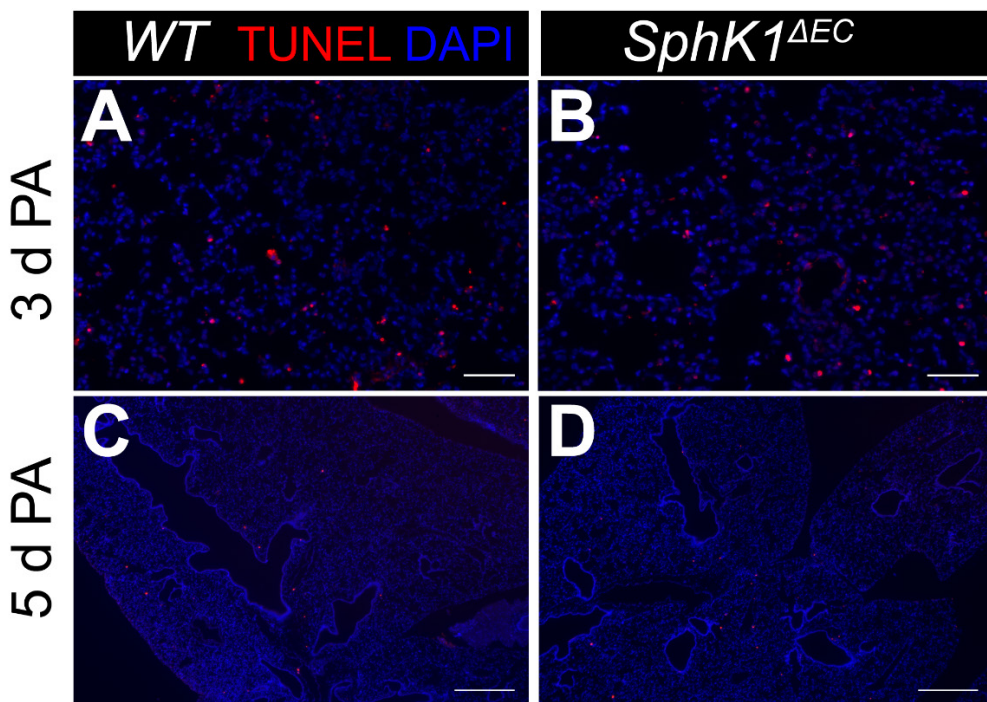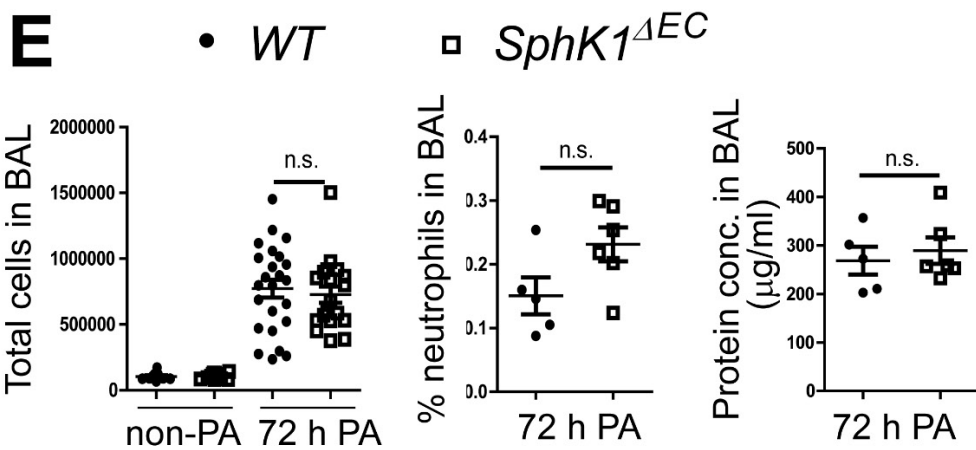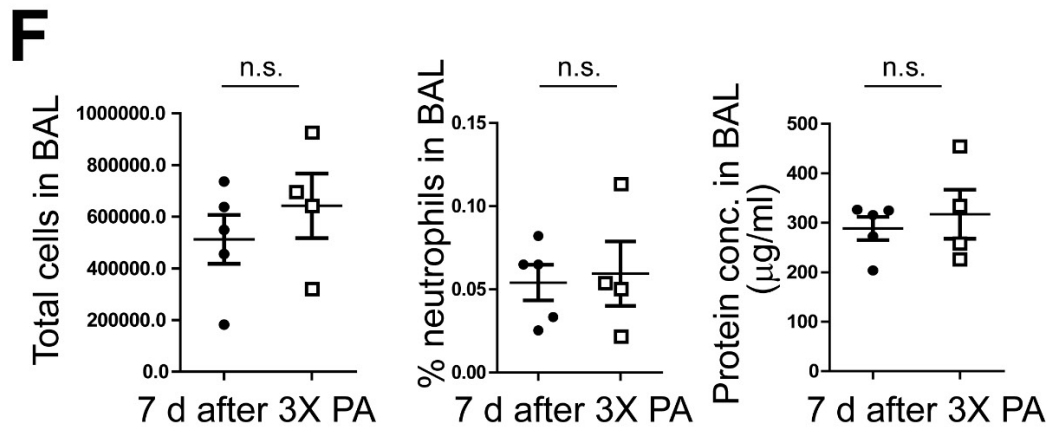

**Figure S3 related to Figure 2. Apoptosis and inflammation in *WT* and *SphK1<sup>ΔEC</sup>* lungs after PA injury. (A-D)**

TUNEL assay was performed on lung sections of 3 d and 5 d post PA *WT* and *SphK1<sup>ΔEC</sup>* mice. Scale bar in 3d PA images = 50  $\mu\text{m}$ . Scale bar in 5d PA images = 500  $\mu\text{m}$ . (E, F) BAL fluids were collected from uninjured, 72h post injured (E) or 7 d post 3 repetitively injured (F) lungs of *WT* and *SphK1<sup>ΔEC</sup>* mice. Total numbers of cells in BAL were counted. Percentage of neutrophils in BAL cells was scored by HEMA3 staining on cells fixed by cytospin. Protein concentration in BAL fluids was measured by BCA assays. Mean  $\pm$  SEM. n.s.: not significant.

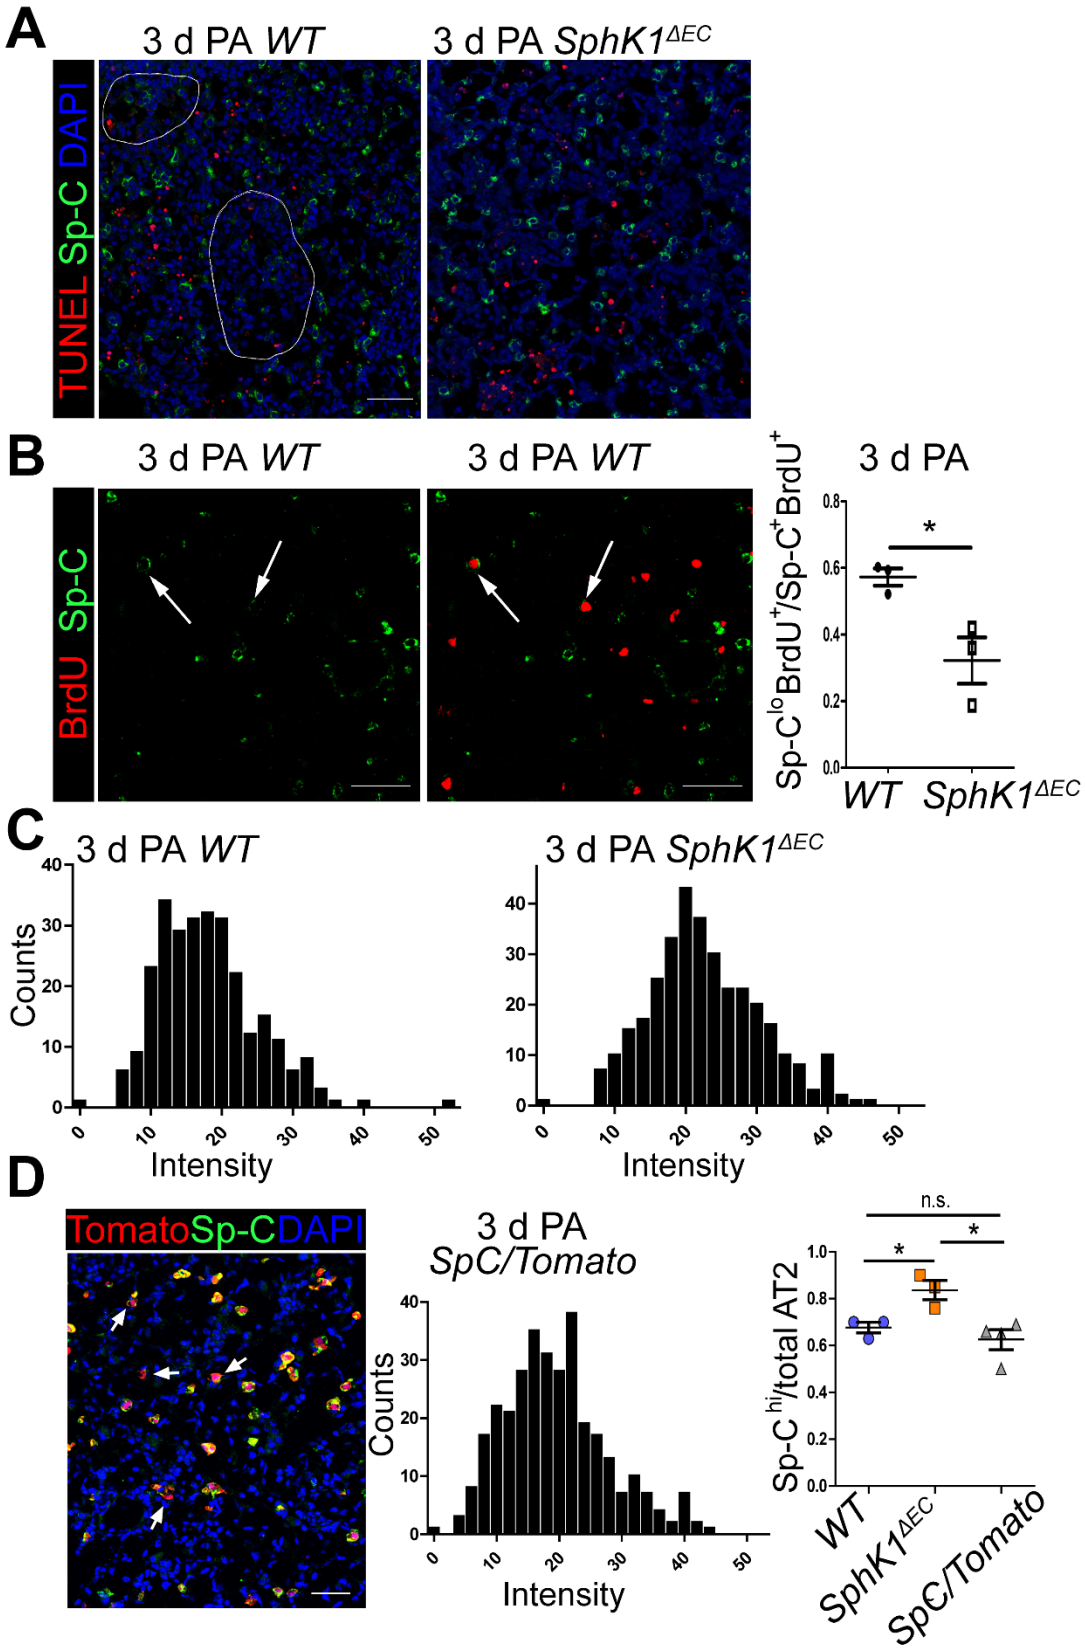



**Figure S4 related to Figure 3. Reduction of Sp-C expression in *WT* AT2 after PA is not due to cell death.** (A)

Lung sections of *WT* and *SphK1<sup>ΔEC</sup>* mice at 72 h post-PA were stained by TUNEL assay and anti-Sp-C antibodies.

Images were taken at areas showing signs of pneumonia, and regions showing Sp-C reduction were circled. Cells in the circles did not show higher apoptotic levels than those in neighboring areas, and the overall apoptotic levels were similar between *WT* and *SphK1<sup>ΔEC</sup>* mice. Scale bar = 50μm. (B) BrdU and Sp-C staining on 3d post PA lungs

showed that some cells with low Sp-C expression (arrow) are BrdU<sup>+</sup> (Sp-C<sup>lo</sup>BrdU<sup>+</sup>). Scale bar = 50μm. The fraction of Sp-C<sup>lo</sup>BrdU<sup>+</sup> cells among total BrdU<sup>+</sup> AT2 were quantified and compared between *WT* and *SphK1<sup>ΔEC</sup>* mice. (C)

Sp-C fluorescence staining intensity of Sp-C<sup>+</sup> cells were measured on lung sections of 3 d post PA *WT* and *SphK1<sup>ΔEC</sup>* mice. > 100 cells were scored per animal and distribution of Sp-C fluorescence intensity was plotted. The

measurements were performed with 3 mice of each genotype and similar results were obtained. (D) Cyrosections of *SpC/Tomato* mice lungs isolated at 3 d post PA were stained for Sp-C. Endogenous Tomato is shown. Arrows point to Tomato<sup>+</sup> AT2 that show reduced Sp-C levels. Scale bar = 25 μm. The staining was repeated for 4 mice and Sp-C

fluorescence staining intensity was measured from >200 cells per animal. A representative plot of the distribution of Sp-C fluorescence is shown. Cells with Sp-C fluorescence staining intensity >15 were scored as Sp-C<sup>hi</sup> cells and the percentage of Sp-C<sup>hi</sup> cells over total Sp-C<sup>+</sup> cells were quantified in *WT*, *SphK1<sup>ΔEC</sup>* and *SpC/Tomato* mice. Mean ±

SEM. \*: p<0.05; n.s.: not significant.

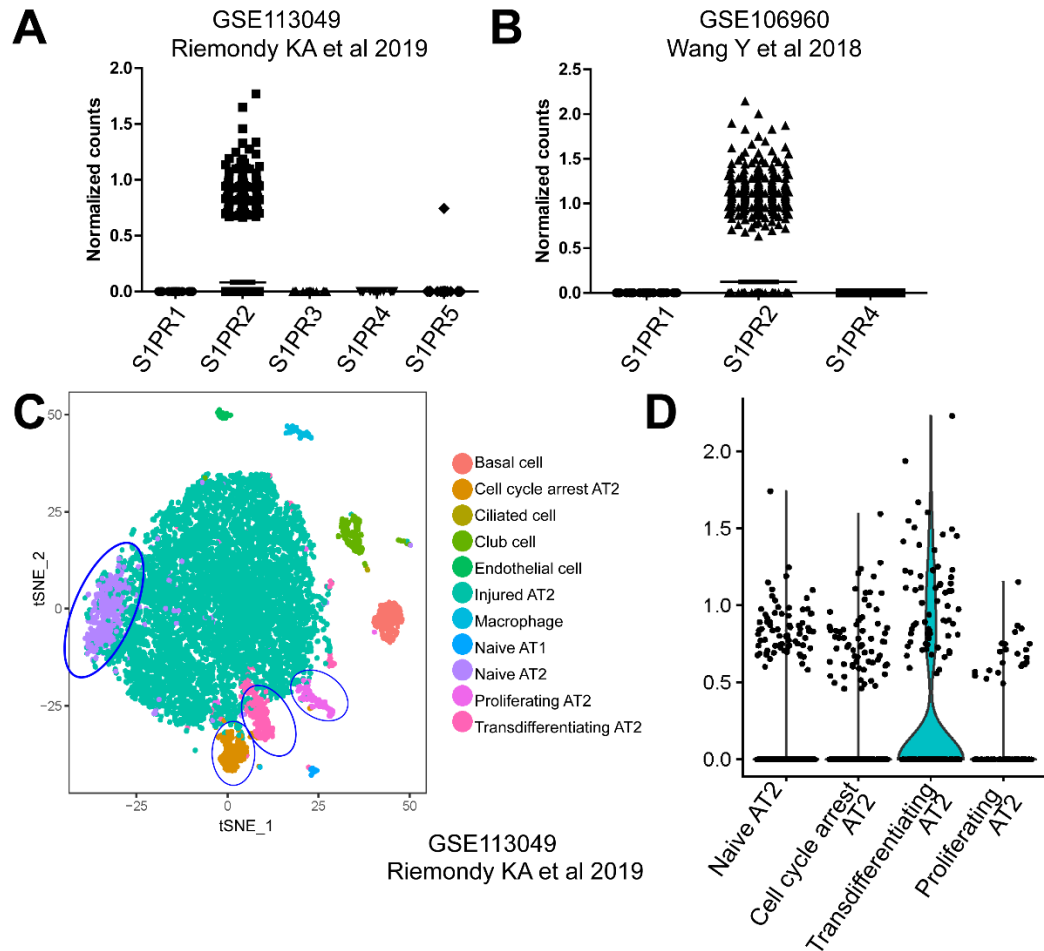

**Figure S5 related to Figure 4. S1P receptor expression in AT2 analyzed from published scRNA-seq data.** (A) scRNA-seq data of naïve AT2 cells were extracted from the GSE113049 dataset and normalized expression levels of the five S1P receptors were plotted. (B) *S1PR1*, *S1PR2* and *S1PR4* expression in postnatal day 60 AT2 cells (GSM2858342) in the GSE106960 dataset were plotted. *S1PR3* and *S1PR5* were not in this dataset. (C) Unsupervised clustering of the scRNA-seq data from GSE113049 revealed distinct clustering of AT2 cells at different reparative stages as similarly shown in Riemony KA et.al. (D) Expression levels of *S1PR2* in different subpopulations of AT2 cells were plotted in a violin plot.

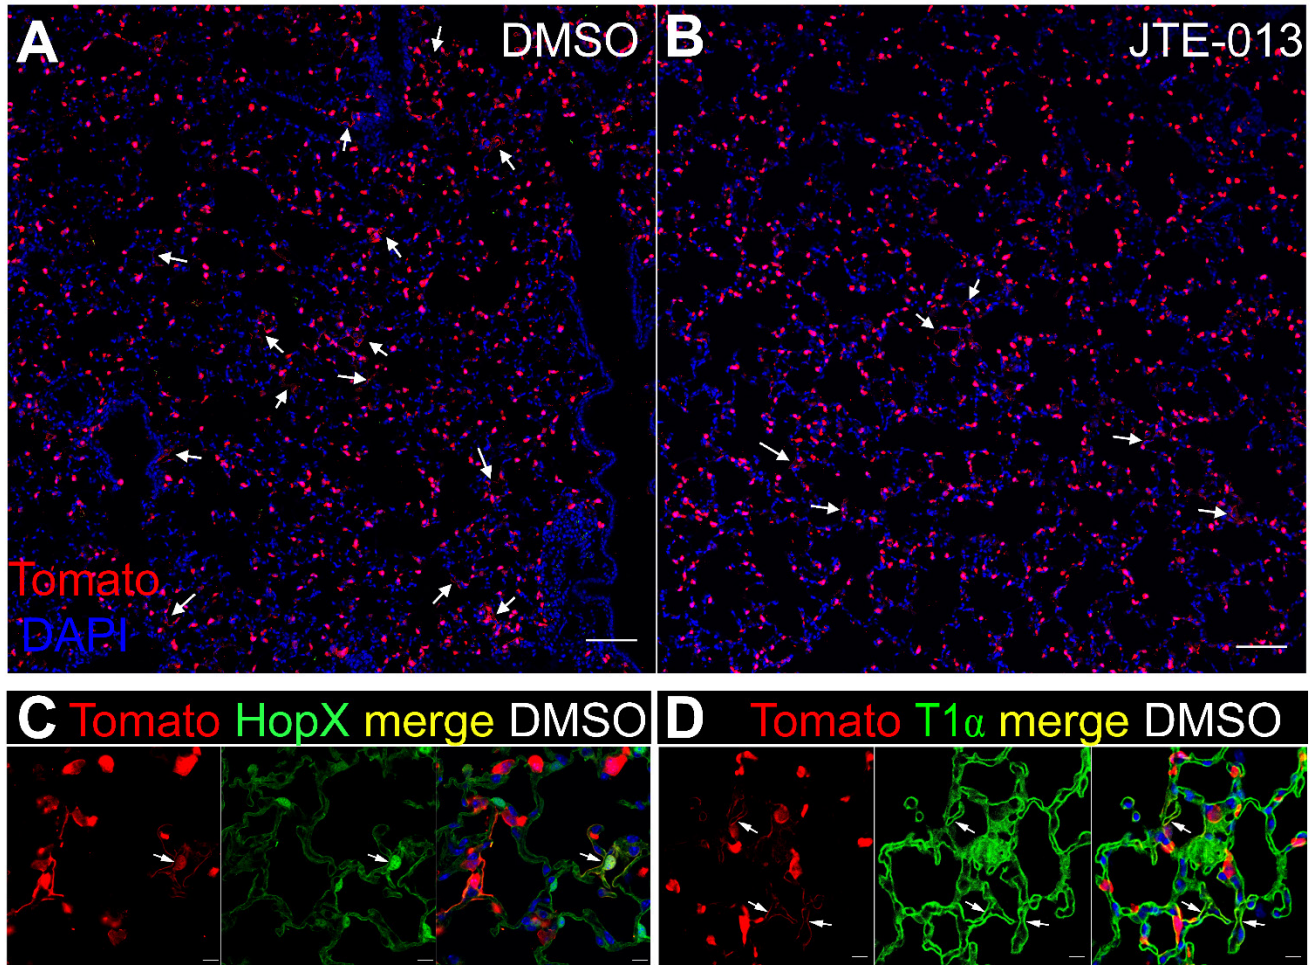

**Figure S6 related to Figure 6. JTE-013 inhibits AT2 to AT1 cell transition *in vivo*.** (A-B) Tiled images were taken to show larger areas of the lungs of *SpC/Tomato* mice that had been injected with DMSO (A) or JTE-013 (B) after PA injury. Arrows point to AT1-like squamous Tomato<sup>+</sup> cells. Scale bar= 100μm. (C, D) Squamous Tomato<sup>+</sup> cells (arrows) in DMSO treated lungs co-express AT1 markers, HopX (C) and T1α (D). Scale bar = 10μm.

**A**

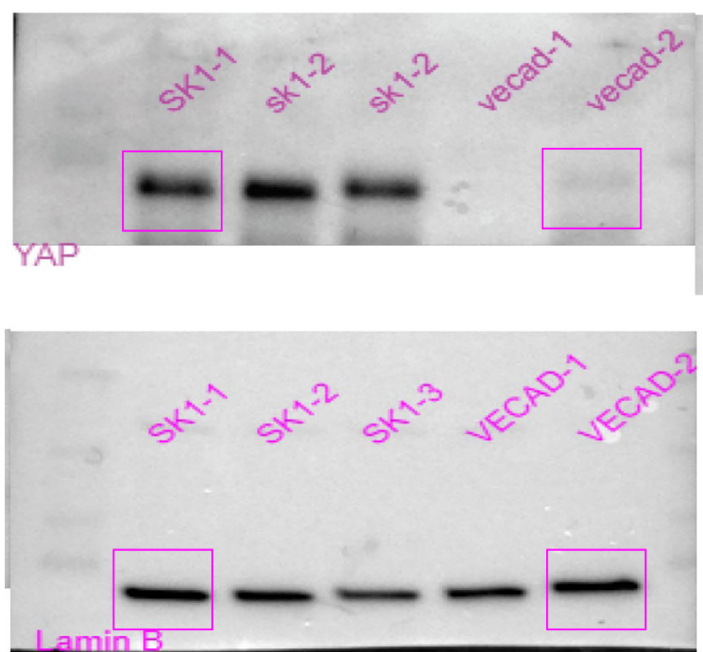

**B**

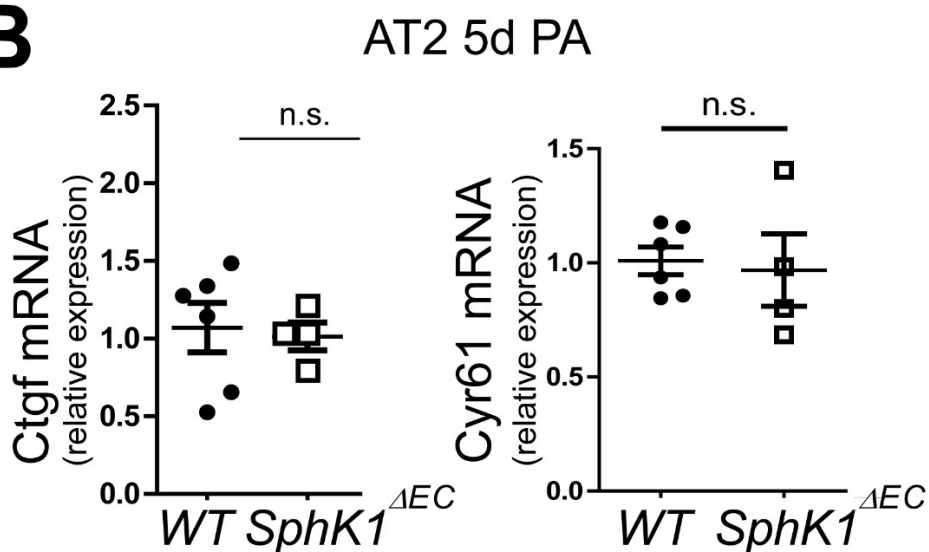

**Figure S7 related to Figure 7. YAP activation and target gene expression.** (A) Original blot of Figure 7H. (B) Expression levels of two YAP targets, *Ctgf* and *Cyr61*, in AT2 isolated from 5d post PA lungs of WT and *SphK1*<sup>ΔEC</sup> mice were analyzed by qPCR. Mean ± SEM. n.s.: not significant.

**Table S1 Related to Star Methods**

| <b>Gene</b> |                                  | <b>Primer sequence (5'--3')</b>       |
|-------------|----------------------------------|---------------------------------------|
| S1pr1       | Forward                          | CTGTTAGATGTGGGCTGCAA                  |
|             | Reverse                          | ATGATGGGGTTGGTACCTGA                  |
| S1pr2       | Forward                          | CCGACATTTCTGGAGGGTAA                  |
|             | Reverse                          | TGAGGTCACCTGGTCTCTCC                  |
| S1pr3       | Forward                          | TGCCTTATGAACCCTGGAAG                  |
|             | Reverse                          | AAGAGCAAATGCCATCAGGT                  |
| S1pr4       | Forward                          | CTCCAAGGGCTATGTGCTCT                  |
|             | Reverse                          | ATTGGCTCGGACCACTCTAA                  |
| S1pr5       | Forward                          | ACACCAAATGCCAGCTTAC                   |
|             | Reverse                          | TGGAGCACTGTGCAAAAGTC                  |
| SphK1       | Forward                          | GCTGTGAGGCTGGTGTATG                   |
|             | Reverse                          | ATATGCTTGCCCTTCTGCAT                  |
| SphK2       | Forward                          | ACTGCTCGCTTCTTCTCTGC                  |
|             | Reverse                          | GCCACTGACAGGAAGGAAAA                  |
| Sp-C        | Forward                          | GCCTTCTCATCGTGGTTGT                   |
|             | Reverse                          | CCAGTATCATGCCCTTCCT                   |
| Hopx        | Forward                          | TCAACAAGGTCGACAAGCAC                  |
|             | Reverse                          | AGGCGCTGCTTAAACCATT                   |
| Aqp5        | Forward                          | AGCCTTATCCATTGGCTTGTC                 |
|             | Reverse                          | TGAGAGGGGCTGAACCGAT                   |
| CTGF        | Forward                          | CTCCACCCGAGTTACCAATG                  |
|             | Reverse                          | TGGCGATTTTAGGTGTCCG                   |
| Cyr61       | Forward                          | GGAGGTGGAGTTAACGAGAAAC                |
|             | Reverse                          | GTGGTCTGAACGATGCATTTC                 |
| Ppp1r3b     | Forward                          | AGCCGTACAATGGACCAGAT                  |
|             | Reverse                          | AGTAGTAGGGCCCCAGCTTT                  |
| Gadd45b     | Forward                          | GCCCGAGACCTGCACTGCCT                  |
|             | Reverse                          | CCATTGGTTATTGCCTCTGCTCTCTT            |
| Sgk1        | Forward                          | CGCCAAGTCCCTCTCAACAA                  |
|             | Reverse                          | TGCCCTTTCCGATCACTTTC                  |
| CLO         | Forward                          | CTTGTCATGGCAAATGCTG                   |
|             | Reverse                          | TGATCTTCTTGCTGGTCTTGC                 |
| CDC25C      | QuantiTect Primer Assay (Qiagen) |                                       |
| CCNB1       | QuantiTect Primer Assay (Qiagen) |                                       |
| Ager        | Taqman assay                     | Assay ID: Mm01134790_g1, Cat#:4331182 |
| Gapdh       | Taqman assay                     | Assay ID: Mm99999915_g1, Cat#:4331182 |
